# Supplementary material for: Revealing the Diversity of the Mycobiome in Different Phases of Ticks: ITS Gene‐Based Analysis
Source: Hindawi journal article supplement (doi:10.1155/2024/8814592), 2024-01-01

**Fig 1. Chao diversity indexes for group tick samples based on rarefaction curves of OTUs.**

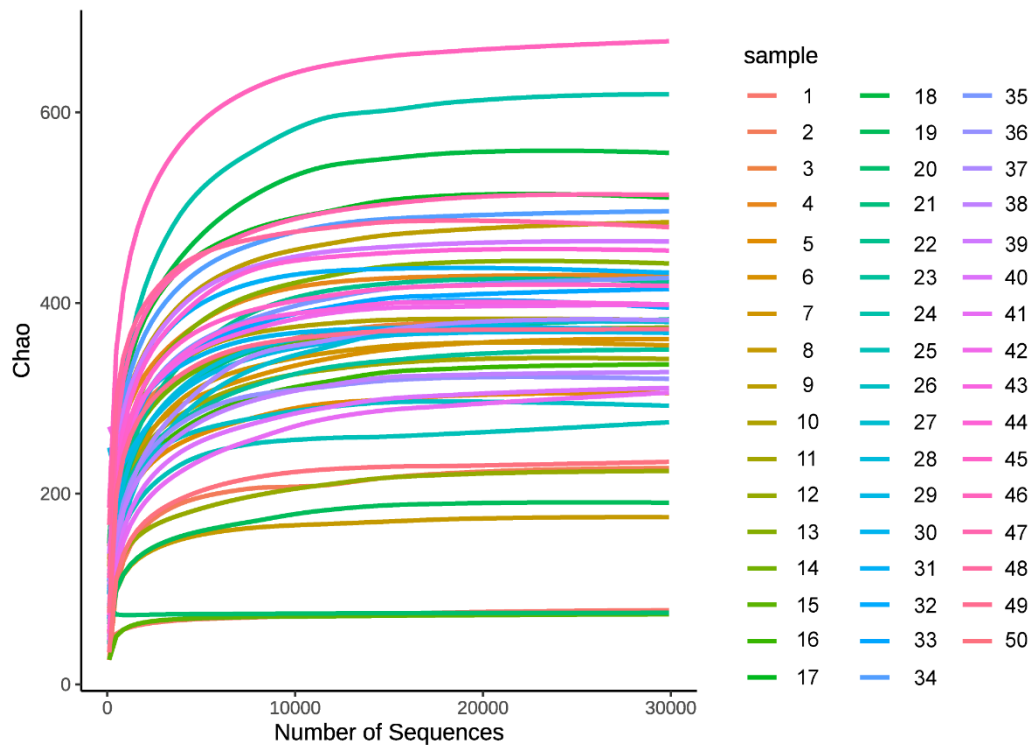

**Fig 2. Shannon diversity indexes for group tick samples based on rarefaction curves of OTUs.**

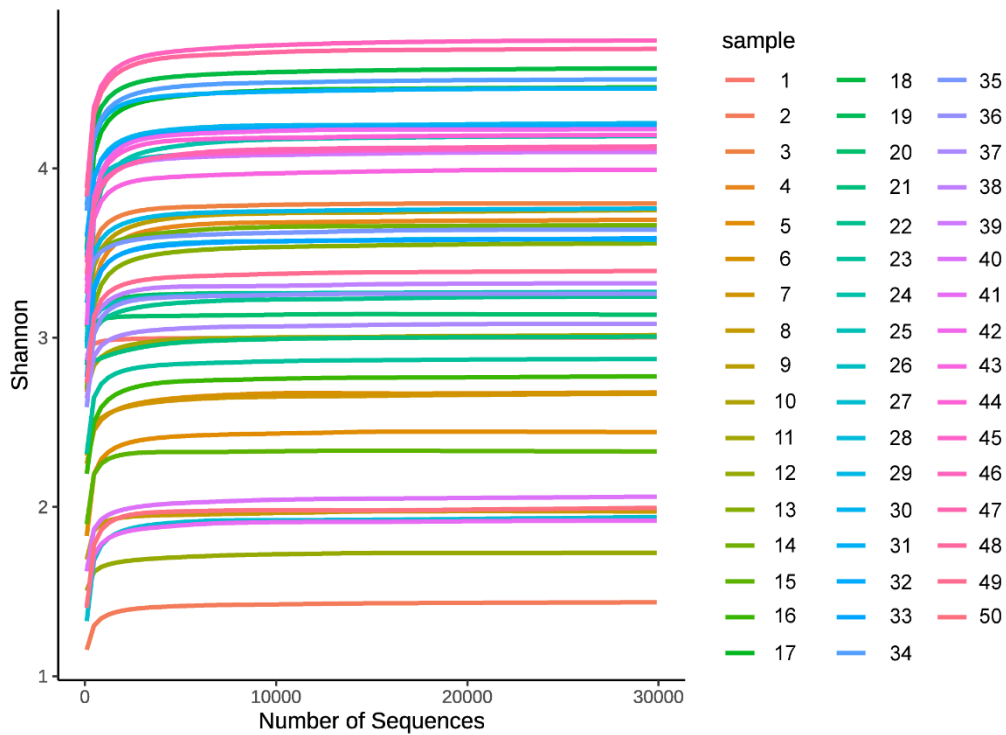

**Fig 3. Simpson diversity indexes for group tick samples based on rarefaction curves of OTUs.**

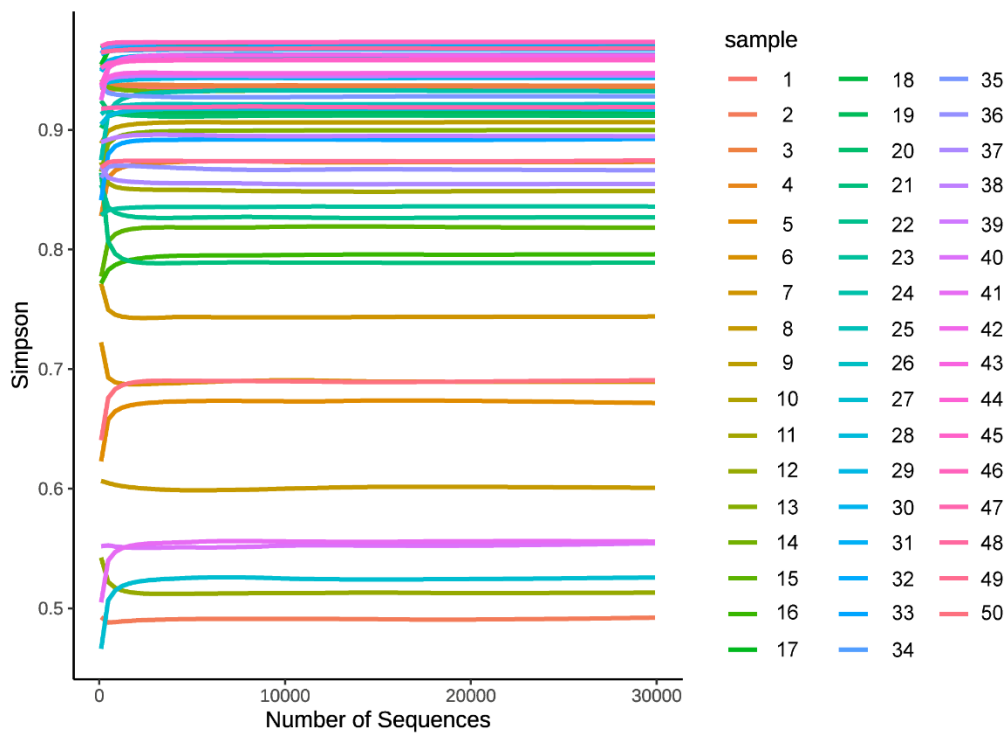

Supplement: f1 [file 8814592.f1.pdf]
