# Supplementary material for: Revealing the Diversity of the Mycobiome in Different Phases of Ticks: ITS Gene‐Based Analysis
Source: Hindawi journal article supplement (doi:10.1155/2024/8814592), 2024-01-01
Supplement: f2 [file 8814592.f2.pdf]

**Table S1. Results of co-occurrence network analysis of the fungal genus.**

| Target        | Source            | correlation | pvalue   | po ne    |
|---------------|-------------------|-------------|----------|----------|
| Alternaria    | Chaetomium        | -0.33211    | 0.01846  | negative |
| Alternaria    | Stagonosporopsis  | 0.302408    | 0.032801 | positive |
| Alternaria    | Canariomyces      | -0.43501    | 0.001594 | negative |
| Alternaria    | Wojnowiciella     | 0.398021    | 0.004202 | positive |
| Ascochyta     | Thelebolus        | 0.531057    | 7.26E-05 | positive |
| Ascochyta     | Aspergillus       | 0.351776    | 0.01224  | positive |
| Ascochyta     | Phoma             | 0.531689    | 7.09E-05 | positive |
| Ascochyta     | Botrytis          | 0.390145    | 0.005096 | positive |
| Ascochyta     | Wojnowiciella     | 0.307298    | 0.029947 | positive |
| Ascochyta     | Periconia         | 0.441491    | 0.00133  | positive |
| Ascochyta     | Dematiopleospora  | 0.366407    | 0.008869 | positive |
| Ascochyta     | Penicillium       | 0.388109    | 0.005352 | positive |
| Ascochyta     | Chaetopyrena      | 0.351354    | 0.012351 | positive |
| Ascochyta     | Stagonosporopsis  | 0.333666    | 0.017884 | positive |
| Ascochyta     | Nothophoma        | 0.466279    | 0.000643 | positive |
| Aspergillus   | Chaetopyrena      | 0.389466    | 0.00518  | positive |
| Aureobasidium | Filobasidium      | 0.607642    | 2.87E-06 | positive |
| Aureobasidium | Debaryomyces      | 0.699906    | 1.55E-08 | positive |
| Aureobasidium | Dothidea          | 0.573553    | 1.34E-05 | positive |
| Aureobasidium | Sporormiella      | -0.31938    | 0.02377  | negative |
| Aureobasidium | Thelebolus        | -0.30257    | 0.032702 | negative |
| Aureobasidium | Naganishia        | 0.313456    | 0.026651 | positive |
| Beauveria     | Myrmecridium      | 0.339159    | 0.015977 | positive |
| Beauveria     | Ascochyta         | 0.341094    | 0.015347 | positive |
| Beauveria     | Paraphaeosphaeria | 0.342131    | 0.015019 | positive |
| Beauveria     | Penicillium       | 0.435211    | 0.001585 | positive |
| Beauveria     | Phoma             | 0.392747    | 0.004784 | positive |
| Beauveria     | Thelebolus        | 0.551202    | 3.35E-05 | positive |
| Beauveria     | Botrytis          | 0.322217    | 0.022487 | positive |
| Beauveria     | Chaetopyrena      | 0.397886    | 0.004216 | positive |
| Beauveria     | Aspergillus       | 0.330593    | 0.019034 | positive |
| Botrytis      | Chaetopyrena      | 0.495381    | 0.000255 | positive |
| Botrytis      | Myrmecridium      | 0.312414    | 0.027186 | positive |
| Botrytis      | Gibberella        | 0.359552    | 0.010332 | positive |
| Botrytis      | Aspergillus       | 0.370021    | 0.008172 | positive |
| Canariomyces  | Vishniacozyma     | -0.31573    | 0.025515 | negative |
| Canariomyces  | Naganishia        | 0.303409    | 0.032199 | positive |
| Chaetopyrena  | Leptosphaeria     | 0.403672    | 0.003649 | positive |
| Cladosporium  | Heterophoma       | 0.303462    | 0.032167 | positive |
| Cladosporium  | Thelebolus        | 0.440307    | 0.001375 | positive |
| Cladosporium  | Neoscoleobasidium | 0.325431    | 0.021104 | positive |
| Cladosporium  | Mucor             | 0.57162     | 1.45E-05 | positive |
| Cladosporium  | Nothophoma        | 0.372206    | 0.007775 | positive |
| Cladosporium  | Botrytis          | 0.317067    | 0.024863 | positive |

|                   |                   |          |          |          |
|-------------------|-------------------|----------|----------|----------|
| Cladosporium      | Periconia         | 0.416095 | 0.002652 | positive |
| Coprinopsis       | Chaetomium        | 0.308526 | 0.029264 | positive |
| Coprinopsis       | Botrytis          | 0.315217 | 0.025766 | positive |
| Debaryomyces      | Dothidea          | 0.459783 | 0.000782 | positive |
| Debaryomyces      | Dematiopleospora  | -0.38954 | 0.005171 | negative |
| Dematiopleospora  | Chaetomium        | -0.30254 | 0.03272  | negative |
| Dematiopleospora  | Leptosphaeria     | 0.418697 | 0.002477 | positive |
| Dematiopleospora  | Aspergillus       | 0.360013 | 0.010228 | positive |
| Dematiopleospora  | Chaetopyrena      | 0.399798 | 0.004021 | positive |
| Didymella         | Alternaria        | 0.397913 | 0.004214 | positive |
| Didymella         | Stagonosporopsis  | 0.467237 | 0.000624 | positive |
| Didymella         | Chaetopyrena      | 0.410298 | 0.003083 | positive |
| Didymella         | Mucor             | -0.31057 | 0.028157 | negative |
| Didymella         | Ascochyta         | 0.400359 | 0.003965 | positive |
| Didymella         | Dematiopleospora  | 0.449115 | 0.001069 | positive |
| Didymella         | Phoma             | 0.499091 | 0.000225 | positive |
| Didymella         | Botrytis          | 0.309813 | 0.028562 | positive |
| Didymella         | Wojnowiciella     | 0.391202 | 0.004967 | positive |
| Dothidea          | Vishniacozyma     | 0.466419 | 0.00064  | positive |
| Filobasidium      | Naganishia        | 0.389445 | 0.005183 | positive |
| Filobasidium      | Vishniacozyma     | 0.474346 | 0.000501 | positive |
| Filobasidium      | Stagonosporopsis  | 0.320474 | 0.023269 | positive |
| Filobasidium      | Dothidea          | 0.540911 | 5.00E-05 | positive |
| Filobasidium      | Debaryomyces      | 0.647509 | 3.73E-07 | positive |
| Filobasidium      | Sporormiella      | -0.36094 | 0.01002  | negative |
| Gibberella        | Myrmecridium      | 0.324517 | 0.02149  | positive |
| Heterophoma       | Epicoccum         | 0.324502 | 0.021497 | positive |
| Heterophoma       | Penicillium       | 0.333241 | 0.01804  | positive |
| Heterophoma       | Dematiopleospora  | 0.411584 | 0.002982 | positive |
| Mucor             | Neoscoleobasidium | 0.316124 | 0.025319 | positive |
| Mucor             | Epicoccum         | 0.409    | 0.003187 | positive |
| Mucor             | Heterophoma       | 0.317536 | 0.024638 | positive |
| Mucor             | Chaetomium        | 0.308378 | 0.029346 | positive |
| Nothophoma        | Phaeosphaeria     | 0.376544 | 0.007034 | positive |
| Nothophoma        | Naganishia        | 0.346678 | 0.013648 | positive |
| Nothophoma        | Periconia         | 0.306534 | 0.030379 | positive |
| Paraphaeosphaeria | Ascochyta         | 0.338641 | 0.016149 | positive |
| Paraphaeosphaeria | Periconia         | 0.357618 | 0.010781 | positive |
| Paraphaeosphaeria | Didymella         | 0.479206 | 0.00043  | positive |
| Paraphaeosphaeria | Mucor             | -0.30356 | 0.03211  | negative |
| Paraphaeosphaeria | Aspergillus       | 0.311606 | 0.027607 | positive |
| Paraphaeosphaeria | Phaeosphaeria     | 0.396637 | 0.004349 | positive |
| Paraphaeosphaeria | Chaetopyrena      | 0.467494 | 0.000619 | positive |
| Paraphaeosphaeria | Stagonosporopsis  | 0.454841 | 0.000905 | positive |
| Paraphaeosphaeria | Leptosphaeria     | 0.305997 | 0.030685 | positive |
| Paraphaeosphaeria | Phoma             | 0.697289 | 1.84E-08 | positive |
| Paraphaeosphaeria | Coprinopsis       | 0.373017 | 0.007631 | positive |

|                   |                   |          |          |          |
|-------------------|-------------------|----------|----------|----------|
| Paraphaeosphaeria | Nothophoma        | 0.338946 | 0.016047 | positive |
| Paraphaeosphaeria | Dematiopleospora  | 0.404919 | 0.003536 | positive |
| Penicillium       | Aspergillus       | 0.303135 | 0.032362 | positive |
| Penicillium       | Wojnowiciella     | 0.558171 | 2.53E-05 | positive |
| Periconia         | Aspergillus       | 0.496411 | 0.000246 | positive |
| Periconia         | Coprinopsis       | 0.37101  | 0.00799  | positive |
| Periconia         | Heterophoma       | 0.317888 | 0.02447  | positive |
| Periconia         | Botrytis          | 0.491929 | 0.000285 | positive |
| Periconia         | Chaetopyrena      | 0.340285 | 0.015608 | positive |
| Periconia         | Phaeosphaeria     | 0.392149 | 0.004854 | positive |
| Phaeosphaeria     | Chaetopyrena      | 0.356977 | 0.010933 | positive |
| Phaeosphaeria     | Aspergillus       | 0.334369 | 0.01763  | positive |
| Phaeosphaeria     | Canariomyces      | 0.384995 | 0.005767 | positive |
| Phoma             | Nothophoma        | 0.413923 | 0.002807 | positive |
| Phoma             | Stagonosporopsis  | 0.530574 | 7.39E-05 | positive |
| Phoma             | Heterophoma       | 0.389247 | 0.005208 | positive |
| Phoma             | Aspergillus       | 0.405775 | 0.00346  | positive |
| Phoma             | Chaetopyrena      | 0.356624 | 0.011018 | positive |
| Phoma             | Alternaria        | 0.458478 | 0.000813 | positive |
| Phoma             | Phaeosphaeria     | 0.36207  | 0.009772 | positive |
| Phoma             | Dematiopleospora  | 0.461407 | 0.000745 | positive |
| Phoma             | Periconia         | 0.403939 | 0.003624 | positive |
| Phoma             | Penicillium       | 0.38311  | 0.006031 | positive |
| Phoma             | Wojnowiciella     | 0.502989 | 0.000197 | positive |
| Preussia          | Camarosporidiella | -0.31405 | 0.026347 | negative |
| Preussia          | Penicillium       | 0.475893 | 0.000478 | positive |
| Preussia          | Heterophoma       | 0.441537 | 0.001328 | positive |
| Purpureocillium   | Beauveria         | 0.369284 | 0.00831  | positive |
| Purpureocillium   | Alternaria        | 0.406168 | 0.003426 | positive |
| Sporormiella      | Vishniacozyma     | -0.41632 | 0.002637 | negative |
| Sporormiella      | Curvularia        | 0.312025 | 0.027388 | positive |
| Sporormiella      | Periconia         | 0.422092 | 0.002264 | positive |
| Sporormiella      | Penicillium       | 0.433578 | 0.001658 | positive |
| Sporormiella      | Beauveria         | 0.348293 | 0.013188 | positive |
| Sporormiella      | Dothidea          | -0.45634 | 0.000866 | negative |
| Sporormiella      | Thelebolus        | 0.524349 | 9.29E-05 | positive |
| Sporormiella      | Canariomyces      | 0.371117 | 0.007971 | positive |
| Thelebolus        | Penicillium       | 0.566873 | 1.77E-05 | positive |
| Thelebolus        | Preussia          | 0.382545 | 0.006112 | positive |
| Thelebolus        | Phoma             | 0.34911  | 0.01296  | positive |
| Thelebolus        | Aspergillus       | 0.394721 | 0.004558 | positive |
| Thelebolus        | Dothidea          | -0.42069 | 0.00235  | negative |
| Thelebolus        | Mucor             | 0.3802   | 0.006459 | positive |
| Thelebolus        | Botrytis          | 0.477465 | 0.000455 | positive |
| Thelebolus        | Heterophoma       | 0.39353  | 0.004693 | positive |
| Thelebolus        | Periconia         | 0.448788 | 0.00108  | positive |
| Thelebolus        | Myrmecridium      | 0.520473 | 0.000107 | positive |

|                 |                    |          |          |          |
|-----------------|--------------------|----------|----------|----------|
| Tranzscheliella | Paraphaeosphaeria  | 0.656203 | 2.30E-07 | positive |
| Tranzscheliella | Didymella          | 0.406967 | 0.003357 | positive |
| Tranzscheliella | Chaetopyrena       | 0.345863 | 0.013885 | positive |
| Tranzscheliella | Periconia          | 0.325273 | 0.021171 | positive |
| Tranzscheliella | Phaeosphaeria      | 0.437947 | 0.001469 | positive |
| Tranzscheliella | Alternaria         | 0.374346 | 0.007401 | positive |
| Tranzscheliella | Camarosporidiella  | 0.423021 | 0.002209 | positive |
| Tranzscheliella | Stagonosporopsis   | 0.369579 | 0.008255 | positive |
| Tranzscheliella | Mucor              | -0.40302 | 0.00371  | negative |
| Tranzscheliella | Phoma              | 0.687585 | 3.47E-08 | positive |
| Vishniacozyma   | Curvularia         | -0.30914 | 0.028928 | negative |
| Wojnowiciella   | Epicoccum          | 0.319781 | 0.023586 | positive |
| Xylaria         | Neoscolecobasidium | 0.714286 | 5.72E-09 | positive |
| Xylaria         | Epicoccum          | 0.402007 | 0.003805 | positive |

---

**Table S2. P values of Spearman correlation heatmap among 30 most abundant genera.**

| Label       | Stagonosp<br>oropsis | Naganishi<br>a | Aureobasi<br>dium | Debaryom<br>yces | Filobasidiu<br>m | Dothidea | Canariom<br>yces | Periconia |
|-------------|----------------------|----------------|-------------------|------------------|------------------|----------|------------------|-----------|
| Stagonosp   | --                   | 0.20649        | 0.18495           | 0.27518          | 0.32047          | 0.2044   | 0.07339          | 0.05625   |
| Naganishia  | 0.20649              | --             | 0.31346           | 0.1323           | 0.38944          | 0.28141  | 0.30341          | 0.15234   |
| Aureobasid  | 0.18495              | 0.31346        | --                | 0.69991          | 0.60764          | 0.57355  | 0.03682          | -0.09483  |
| Debaryomy   | 0.27518              | 0.1323         | 0.69991           | --               | 0.64751          | 0.45978  | 0.05032          | -0.19608  |
| Filobasidiu | 0.32047              | 0.38944        | 0.60764           | 0.64751          | --               | 0.54091  | -0.01262         | -0.07508  |
| Dothidea    | 0.2044               | 0.28141        | 0.57355           | 0.45978          | 0.54091          | --       | -0.08317         | -0.22165  |
| Canariomy   | 0.07339              | 0.30341        | 0.03682           | 0.05032          | -0.01262         | -0.08317 | --               | 0.19467   |
| Periconia   | 0.05625              | 0.15234        | -0.09483          | -0.19608         | -0.07508         | -0.22165 | 0.19467          | --        |
| Phaeospha   | 0.09332              | 0.22832        | 0.11642           | 0.0848           | 0.25102          | -0.07291 | 0.38499          | 0.39215   |
| Cladospori  | 0.05449              | 0.0889         | 0.11843           | 0.18654          | 0.16068          | 0.17271  | -0.01838         | 0.4161    |
| Heteropho   | 0.14501              | 0.05521        | -0.04708          | -0.13965         | -0.05424         | -0.07114 | 0.03053          | 0.31789   |
| Sporormiel  | -0.165               | -0.12639       | -0.31938          | -0.14573         | -0.36094         | -0.45634 | 0.37112          | 0.42209   |
| Preussia    | -0.05647             | 0.09937        | 0.03571           | 0.10202          | -0.02991         | -0.13233 | 0.26626          | 0.19787   |
| Mucor       | -0.20622             | -0.07167       | -0.16357          | -0.06003         | -0.15551         | -0.13197 | 0.05075          | 0.08327   |
| Thelebolus  | 0.03269              | -0.07903       | -0.30257          | -0.16377         | -0.29011         | -0.42069 | 0.12576          | 0.44879   |
| Penicillium | -0.01508             | -0.05522       | -0.18616          | -0.12048         | -0.19271         | -0.29585 | 0.10531          | 0.26192   |
| Ascochyta   | 0.33367              | 0.13943        | -0.27328          | -0.14349         | -0.10487         | -0.23699 | 0.09197          | 0.44149   |
| Dematiopl   | 0.19383              | 0.07339        | -0.23258          | -0.38954         | -0.01633         | -0.15532 | -0.14031         | 0.2853    |
| Tranzscheli | 0.36958              | 0.16602        | -0.1347           | -0.17405         | 0.19324          | -0.06414 | 0.01685          | 0.32527   |
| Alternaria  | 0.30241              | 0.00848        | -0.11148          | -0.14336         | 0.07552          | -0.03586 | -0.43501         | 0.11741   |
| Paraphaeo   | 0.45484              | 0.14447        | -0.11777          | -0.05843         | 0.19619          | -0.02449 | 0.25241          | 0.35762   |
| Phoma       | 0.53057              | 0.28017        | -0.08892          | -0.19316         | 0.08874          | -0.12465 | 0.13203          | 0.40394   |
| Coprinopsi  | 0.22164              | -0.01697       | 0.14553           | 0.11033          | 0.11059          | 0.13922  | 0.21829          | 0.37101   |
| Beauveria   | -0.07889             | -0.23672       | -0.29152          | -0.16838         | -0.16899         | -0.20683 | -0.04738         | 0.29073   |
| Botrytis    | 0.08062              | -0.20626       | -0.18977          | -0.07369         | -0.1316          | -0.21515 | -0.09034         | 0.49193   |
| Nothophor   | 0.24356              | 0.34668        | -0.00298          | -0.03577         | 0.19509          | 0.05763  | 0.26519          | 0.30653   |
| Didymella   | 0.46724              | 0.13372        | -0.02007          | -0.02153         | 0.20552          | 0.02101  | -0.07315         | 0.1926    |
| Vishniacozy | 0.14291              | 0.03855        | 0.28607           | 0.24934          | 0.47435          | 0.46642  | -0.31573         | -0.16509  |
| Purpureoci  | -0.00324             | -0.23639       | -0.16808          | -0.12801         | 0.03447          | 0.00293  | -0.27586         | 0.06206   |
| Xylaria     | 0.09274              | 0.05356        | -0.21811          | -0.11201         | 0.02485          | -0.11608 | -0.09168         | -0.12443  |

| Phaeosph<br>aeria | Cladospori<br>um | Heteroph<br>oma | Sporormie<br>lla | Preussia | Mucor    | Thelebolu<br>s | Penicilliu<br>m | Ascochyta |
|-------------------|------------------|-----------------|------------------|----------|----------|----------------|-----------------|-----------|
| 0.09332           | 0.05449          | 0.14501         | -0.165           | -0.05647 | -0.20622 | 0.03269        | -0.01508        | 0.33367   |
| 0.22832           | 0.0889           | 0.05521         | -0.12639         | 0.09937  | -0.07167 | -0.07903       | -0.05522        | 0.13943   |
| 0.11642           | 0.11843          | -0.04708        | -0.31938         | 0.03571  | -0.16357 | -0.30257       | -0.18616        | -0.27328  |
| 0.0848            | 0.18654          | -0.13965        | -0.14573         | 0.10202  | -0.06003 | -0.16377       | -0.12048        | -0.14349  |
| 0.25102           | 0.16068          | -0.05424        | -0.36094         | -0.02991 | -0.15551 | -0.29011       | -0.19271        | -0.10487  |
| -0.07291          | 0.17271          | -0.07114        | -0.45634         | -0.13233 | -0.13197 | -0.42069       | -0.29585        | -0.23699  |
| 0.38499           | -0.01838         | 0.03053         | 0.37112          | 0.26626  | 0.05075  | 0.12576        | 0.10531         | 0.09197   |
| 0.39215           | 0.4161           | 0.31789         | 0.42209          | 0.19787  | 0.08327  | 0.44879        | 0.26192         | 0.44149   |
| --                | 0.14692          | -0.15964        | 0.16952          | 0.05393  | 0.02783  | 0.14665        | 0.18924         | 0.2643    |
| 0.14692           | --               | 0.30346         | 0.06691          | 0.12175  | 0.57162  | 0.44031        | 0.13123         | 0.27222   |
| -0.15964          | 0.30346          | --              | 0.16434          | 0.44154  | 0.31754  | 0.39353        | 0.33324         | 0.17097   |
| 0.16952           | 0.06691          | 0.16434         | --               | 0.21126  | 0.15006  | 0.52435        | 0.43358         | 0.25834   |
| 0.05393           | 0.12175          | 0.44154         | 0.21126          | --       | 0.19255  | 0.38254        | 0.47589         | 0.21241   |
| 0.02783           | 0.57162          | 0.31754         | 0.15006          | 0.19255  | --       | 0.3802         | 0.13662         | 0.20034   |
| 0.14665           | 0.44031          | 0.39353         | 0.52435          | 0.38254  | 0.3802   | --             | 0.56687         | 0.53106   |
| 0.18924           | 0.13123          | 0.33324         | 0.43358          | 0.47589  | 0.13662  | 0.56687        | --              | 0.38811   |
| 0.2643            | 0.27222          | 0.17097         | 0.25834          | 0.21241  | 0.20034  | 0.53106        | 0.38811         | --        |
| 0.02868           | 0.13271          | 0.41158         | -0.07773         | -0.03904 | 0.03668  | 0.27397        | 0.11375         | 0.36641   |
| 0.43795           | -0.27136         | -0.0011         | 0.1613           | -0.14153 | -0.40302 | 0.0448         | 0.07013         | 0.255     |
| 0.07693           | 0.06767          | 0.14598         | -0.15173         | -0.1049  | -0.16675 | 0.20766        | 0.28601         | 0.28887   |
| 0.39664           | 0.06291          | 0.18168         | 0.19281          | 0.1216   | -0.30356 | 0.21169        | 0.19176         | 0.33864   |
| 0.36207           | 0.05632          | 0.38925         | 0.22943          | 0.20169  | -0.08183 | 0.34911        | 0.38311         | 0.53169   |
| 0.22677           | 0.27324          | 0.17037         | 0.11688          | -0.02561 | 0.03549  | 0.2193         | 0.01304         | 0.11106   |
| 0.29021           | 0.19637          | 0.27326         | 0.34829          | 0.16542  | 0.13585  | 0.5512         | 0.43521         | 0.34109   |
| 0.19908           | 0.31707          | 0.10845         | 0.20193          | -0.02514 | 0.22704  | 0.47747        | 0.19209         | 0.39015   |
| 0.37654           | 0.37221          | 0.22722         | 0.01899          | 0.07764  | 0.23919  | 0.18257        | 0.13159         | 0.46628   |
| 0.26807           | -0.0253          | -0.03656        | -0.0566          | -0.1876  | -0.31057 | 0.04072        | 0.17154         | 0.40036   |
| 0.027             | 0.12437          | 0.02467         | -0.41632         | -0.13394 | -0.06558 | -0.15092       | -0.07342        | 0.02134   |
| 0.11297           | -0.04585         | 0.01424         | -0.08717         | -0.04024 | -0.09611 | 0.07786        | 0.03821         | 0.03892   |
| -0.18507          | 0.23265          | 0.26316         | 0.13368          | 0.23485  | 0.24704  | 0.2335         | 0.23379         | 0.24286   |

| Dematiopl<br>eospora | Tranzschel<br>iella | Alternaria | Paraphae<br>osphaeria | Phoma    | Coprinopsi<br>s | Beauveria | Botrytis | Nothopho<br>ma |
|----------------------|---------------------|------------|-----------------------|----------|-----------------|-----------|----------|----------------|
| 0.19383              | 0.36958             | 0.30241    | 0.45484               | 0.53057  | 0.22164         | -0.07889  | 0.08062  | 0.24356        |
| 0.07339              | 0.16602             | 0.00848    | 0.14447               | 0.28017  | -0.01697        | -0.23672  | -0.20626 | 0.34668        |
| -0.23258             | -0.1347             | -0.11148   | -0.11777              | -0.08892 | 0.14553         | -0.29152  | -0.18977 | -0.00298       |
| -0.38954             | -0.17405            | -0.14336   | -0.05843              | -0.19316 | 0.11033         | -0.16838  | -0.07369 | -0.03577       |
| -0.01633             | 0.19324             | 0.07552    | 0.19619               | 0.08874  | 0.11059         | -0.16899  | -0.1316  | 0.19509        |
| -0.15532             | -0.06414            | -0.03586   | -0.02449              | -0.12465 | 0.13922         | -0.20683  | -0.21515 | 0.05763        |
| -0.14031             | 0.01685             | -0.43501   | 0.25241               | 0.13203  | 0.21829         | -0.04738  | -0.09034 | 0.26519        |
| 0.2853               | 0.32527             | 0.11741    | 0.35762               | 0.40394  | 0.37101         | 0.29073   | 0.49193  | 0.30653        |
| 0.02868              | 0.43795             | 0.07693    | 0.39664               | 0.36207  | 0.22677         | 0.29021   | 0.19908  | 0.37654        |
| 0.13271              | -0.27136            | 0.06767    | 0.06291               | 0.05632  | 0.27324         | 0.19637   | 0.31707  | 0.37221        |
| 0.41158              | -0.0011             | 0.14598    | 0.18168               | 0.38925  | 0.17037         | 0.27326   | 0.10845  | 0.22722        |
| -0.07773             | 0.1613              | -0.15173   | 0.19281               | 0.22943  | 0.11688         | 0.34829   | 0.20193  | 0.01899        |
| -0.03904             | -0.14153            | -0.1049    | 0.1216                | 0.20169  | -0.02561        | 0.16542   | -0.02514 | 0.07764        |
| 0.03668              | -0.40302            | -0.16675   | -0.30356              | -0.08183 | 0.03549         | 0.13585   | 0.22704  | 0.23919        |
| 0.27397              | 0.0448              | 0.20766    | 0.21169               | 0.34911  | 0.2193          | 0.5512    | 0.47747  | 0.18257        |
| 0.11375              | 0.07013             | 0.28601    | 0.19176               | 0.38311  | 0.01304         | 0.43521   | 0.19209  | 0.13159        |
| 0.36641              | 0.255               | 0.28887    | 0.33864               | 0.53169  | 0.11106         | 0.34109   | 0.39015  | 0.46628        |
| --                   | 0.2796              | 0.2864     | 0.40492               | 0.46141  | 0.11716         | 0.26501   | 0.28031  | 0.07457        |
| 0.2796               | --                  | 0.37435    | 0.6562                | 0.68758  | 0.05911         | 0.19613   | 0.14845  | 0.26398        |
| 0.2864               | 0.37435             | --         | 0.24708               | 0.45848  | -0.21882        | 0.2696    | 0.26435  | 0.20729        |
| 0.40492              | 0.6562              | 0.24708    | --                    | 0.69729  | 0.37302         | 0.34213   | 0.29852  | 0.33895        |
| 0.46141              | 0.68758             | 0.45848    | 0.69729               | --       | 0.10718         | 0.39275   | 0.21294  | 0.41392        |
| 0.11716              | 0.05911             | -0.21882   | 0.37302               | 0.10718  | --              | 0.17632   | 0.31522  | 0.00386        |
| 0.26501              | 0.19613             | 0.2696     | 0.34213               | 0.39275  | 0.17632         | --        | 0.32222  | 0.03162        |
| 0.28031              | 0.14845             | 0.26435    | 0.29852               | 0.21294  | 0.31522         | 0.32222   | --       | 0.16279        |
| 0.07457              | 0.26398             | 0.20729    | 0.33895               | 0.41392  | 0.00386         | 0.03162   | 0.16279  | --             |
| 0.44911              | 0.40697             | 0.39791    | 0.47921               | 0.49909  | 0.04477         | 0.10133   | 0.30981  | 0.24325        |
| 0.18213              | 0.01888             | 0.29728    | -0.03899              | -0.11373 | -0.08824        | -0.02622  | -0.0683  | 0.04914        |
| 0.10436              | 0.16568             | 0.40617    | 0.04238               | 0.14526  | -0.23277        | 0.36928   | 0.21953  | 0.03407        |
| 0.2707               | -0.08011            | 0.18387    | 0.24263               | 0.19441  | -0.09187        | 0.23321   | -0.09976 | 0.03015        |

| Didymella | Vishniacoz<br>yma | Purpureoc<br>illium | Xylaria  |
|-----------|-------------------|---------------------|----------|
| 0.46724   | 0.14291           | -0.00324            | 0.09274  |
| 0.13372   | 0.03855           | -0.23639            | 0.05356  |
| -0.02007  | 0.28607           | -0.16808            | -0.21811 |
| -0.02153  | 0.24934           | -0.12801            | -0.11201 |
| 0.20552   | 0.47435           | 0.03447             | 0.02485  |
| 0.02101   | 0.46642           | 0.00293             | -0.11608 |
| -0.07315  | -0.31573          | -0.27586            | -0.09168 |
| 0.1926    | -0.16509          | 0.06206             | -0.12443 |
| 0.26807   | 0.027             | 0.11297             | -0.18507 |
| -0.0253   | 0.12437           | -0.04585            | 0.23265  |
| -0.03656  | 0.02467           | 0.01424             | 0.26316  |
| -0.0566   | -0.41632          | -0.08717            | 0.13368  |
| -0.1876   | -0.13394          | -0.04024            | 0.23485  |
| -0.31057  | -0.06558          | -0.09611            | 0.24704  |
| 0.04072   | -0.15092          | 0.07786             | 0.2335   |
| 0.17154   | -0.07342          | 0.03821             | 0.23379  |
| 0.40036   | 0.02134           | 0.03892             | 0.24286  |
| 0.44911   | 0.18213           | 0.10436             | 0.2707   |
| 0.40697   | 0.01888           | 0.16568             | -0.08011 |
| 0.39791   | 0.29728           | 0.40617             | 0.18387  |
| 0.47921   | -0.03899          | 0.04238             | 0.24263  |
| 0.49909   | -0.11373          | 0.14526             | 0.19441  |
| 0.04477   | -0.08824          | -0.23277            | -0.09187 |
| 0.10133   | -0.02622          | 0.36928             | 0.23321  |
| 0.30981   | -0.0683           | 0.21953             | -0.09976 |
| 0.24325   | 0.04914           | 0.03407             | 0.03015  |
| --        | 0.18213           | 0.24284             | 0.06961  |
| 0.18213   | --                | 0.08132             | 0.2282   |
| 0.24284   | 0.08132           | --                  | -0.16823 |
| 0.06961   | 0.2282            | -0.16823            | --       |
